# Supplementary material
Source: PubMed Central journal article supplement (PMC1819583)
Supplement: neo0902_0136SD1.pdf [file neo0902_0136SD1.pdf]

**Table W1.** All Identified Proteins in  $VARas^{mut}$  Cells and Their Fold Changes According to Four Biologic Replicates.

| Protein Name                                         | Taxonomy* | Accession Number | Molecular Weight $M_w$ (Theoretical/Experimental); kDa) | p / (Theoretical/ Experimental) | SQ <sup>†</sup> 1    |                 | VARas <sup>mut</sup> /VA <sup>‡</sup> |       |       |       |
|------------------------------------------------------|-----------|------------------|---------------------------------------------------------|---------------------------------|----------------------|-----------------|---------------------------------------|-------|-------|-------|
|                                                      |           |                  |                                                         |                                 | VARas <sup>mut</sup> | VA              | 1                                     | 2     | 3     | 4     |
| $\alpha$ Tubulin [fragmented protein]                | H         | NP_116093        | 50.5/38.3                                               | 4.96/5.67                       | 4.485 ± 1,278        | 7,969 ± 4,917   | -1.80                                 | -1.50 | -2.80 | +1.10 |
| Annexin 1                                            | B         | NP_786978        | 39.1/35.8                                               | 6.44/6.39                       | 14,871 ± 4,888       | 3,886 ± 1,802   | +3.80                                 | -1.60 | nd    | +1.50 |
| $\beta/\gamma$ Actin                                 | M         | CAA31455         | 41.3/44.1                                               | 5.56/5.43                       | 58,031 ± 13,449      | 27,218 ± 10,089 | +2.10                                 | -1.15 | +3.30 | -1.05 |
|                                                      | M         | CAA27396         | 39.1/38.2                                               | 5.78/5.69                       | 3,342 ± 1,302        | 5,461 ± 4,311   | -1.60                                 | nd    | nd    | +1.70 |
|                                                      | B         | ATBOB            | 41.9/41.9                                               | 5.31/5.29                       | 2,525 ± 779          | 7,010 ± 2,339   | -2.80                                 | +1.05 | -3.70 | +1.10 |
| $\beta$ Tubulin [fragmented protein]                 | B         | ATBOB            | 41.9/41.9                                               | 5.31/5.33                       | 1,503 ± 522          | 3,497 ± 1,410   | -2.35                                 | +1.30 | -1.55 | +1.30 |
|                                                      | M         | NP_076205        | 50.4/36.0                                               | 4.78/5.59                       | 7,512 ± 2,454        | 2,904 ± 2,238   | +2.60                                 | +1.30 | +1.05 | +1.40 |
| Enolase 1                                            | B         | NP_776474        | 47.6/47.3                                               | 6.44/6.30                       | 16,811 ± 7,415       | 1,107 ± 150     | +15.20                                | -1.75 | nd    | -1.30 |
|                                                      | B         | NP_776474        | 47.6/47.7                                               | 6.44/6.15                       | 5,717 ± 2,818        | 687 ± 292       | +8.30                                 | -1.30 | nd    | ±1.00 |
|                                                      | B         | NP_776474        | 47.6/47.3                                               | 6.44/6.44                       | 25,349 ± 19,299      | 5,456 ± 3,847   | +4.65                                 | -1.20 | nd    | nd    |
| $\gamma$ Actin                                       | H         | AAA51580         | 26.1/26.1                                               | 5.65/5.65                       | 2,362 ± 1,133        | 6,581 ± 1,671   | -2.80                                 | -1.20 | -1.40 | -1.10 |
| Glucose-regulated protein 58 kDa                     | B         | NP_776758        | 57.3/58.6                                               | 6.23/6.16                       | 17,627 ± 4,608       | 8,250 ± 4,153   | +2.15                                 | +1.35 | +2.30 | +2.40 |
| Heat shock 27-kDa protein                            | C         | P42929           | 22.9/25.0                                               | 6.23/6.11                       | 20,929 ± 6,778       | 11,788 ± 4,010  | +1.80                                 | +4.40 | +2.15 | +2.05 |
| Heat shock 70-kDa protein 5                          | H         | NP_006338        | 72.4/75.2                                               | 5.07/5.12                       | 7,416 ± 1,643        | 3,995 ± 2,135   | +1.85                                 | +1.45 | +1.40 | +1.80 |
| Heat shock 70-kDa protein 8                          | B         | NP_776770        | 71.4/71.5                                               | 5.49/5.50                       | 23,658 ± 11,900      | 7,154 ± 3,899   | +3.30                                 | +1.70 | +2.35 | +4.00 |
|                                                      | B         | NP_776770        | 71.4/71.5                                               | 5.49/5.45                       | 5,044 ± 2,138        | 2,061 ± 1,378   | +2.45                                 | +2.15 | +2.40 | nd    |
| Keratin type I, cytoskeletal 19                      | B         | P08728           | 43.9/41.7                                               | 4.92/5.02                       | 11,770 ± 1,941       | 21,558 ± 17,399 | -1.80                                 | +1.95 | ±1.00 | +2.40 |
|                                                      | B         | P08728           | 43.9/39.1                                               | 4.92/4.73                       | 486 ± 254            | 2,611 ± 445     | -5.40                                 | nd    | nd    | nd    |
| Keratin type II, cytoskeletal 8                      | B         | P05786           | 42.2/53.3                                               | 5.13/5.92                       | 11,109 ± 1,853       | 3,051 ± 2,970   | +3.65                                 | +2.90 | nd    | +3.20 |
|                                                      | B         | P05786           | 42.4/48.7                                               | 5.13/5.65                       | 517 ± 234            | 2,984 ± 1,333   | -5.75                                 | nd    | nd    | nd    |
| Keratin, type II cytoskeletal 8 [fragmented protein] | B         | P05786           | 42.4/26.4                                               | 5.13/5.01                       | 1,698 ± 730          | 3,698 ± 1,173   | -2.15                                 | -2.65 | -3.00 | +2.00 |
|                                                      | B         | P05786           | 42.4/25.0                                               | 5.13/4.60                       | 4,605 ± 1,768        | 8,745 ± 3,563   | -1.90                                 | +1.30 | +1.40 | +1.75 |
| Myosin regulatory light chain                        | H         | NP_006462        | 19.8/21.2                                               | 4.67/4.60                       | 1,237 ± 1,043        | 3,481 ± 2,016   | -2.80                                 | nd    | -3.25 | nd    |
| <i>N</i> -acetyl-galactosaminyl-transferase          | B         |                  | /37.6                                                   | /6.25                           | 1,305 ± 650          | 1,746 ± 490     | -1.35                                 | +1.10 | ±1.00 | +1.80 |
| Peroxyredoxin 2                                      | B         | NP_777188        | 22.2/23.7                                               | 5.37/5.37                       | 8,364 ± 2,228        | 6,889 ± 1,767   | +1.20                                 | +1.10 | -1.20 | +1.10 |
| Proliferating cell nuclear antigen                   | M         | NP_035175        | 29.1/32.7                                               | 4.66/4.60                       | 583 ± 155            | 2,360 ± 922     | -4.05                                 | -4.80 | -6.20 | nd    |
| RhoGDP dissociation inhibitor $\alpha$               | B         | NP_788823        | 23.5/26.5                                               | 5.12/5.24                       | 4,143 ± 1,399        | 1,710 ± 441     | +2.40                                 | nd    | +1.90 | +1.20 |
| Stress-induced phosphoprotein 1                      | M         | AAH03794         | 63.2/64.6                                               | 6.40/6.27                       | 8,770 ± 2,853        | 1,916 ± 1,324   | +4.60                                 | +2.20 | +3.65 | +1.60 |
| Triosephosphate isomerase 1                          | H         | NP_000356        | 26.9/25.5                                               | 6.45/6.38                       | 5,515 ± 1,647        | 2,678 ± 1,452   | +2.05                                 | -1.90 | nd    | nd    |
| Tropomyosin 1                                        | H         | NP_000357        | 32.8/31.2                                               | 4.81/4.69                       | 2,591 ± 2,002        | 8,033 ± 3,534   | -3.10                                 | -1.60 | +1.25 | -2.10 |
| Tropomyosin 4                                        | H         | NP_003281        | 28.6/28.6                                               | 4.67/4.75                       | 3,153 ± 732          | 2,178 ± 1,746   | +1.45                                 | -1.15 | +1.80 | nd    |
| Tropomyosin 5                                        | M         | S11390           | 29.2/28.6                                               | 4.75/4.80                       | 16,990 ± 3,996       | 10,520 ± 2,250  | +1.60                                 | ±1.00 | +1.10 | -1.40 |
| Tropomyosin 5                                        | M         | S11390           | 29.2/28.6                                               | 4.75/4.67                       | 16,548 ± 3,928       | 24,044 ± 10,393 | -1.45                                 | +1.20 | +1.60 | +1.05 |
| Vimentin                                             | B         | NP_776394        | 53.7/51.6                                               | 5.20/5.00                       | 3,878 ± 5,754        | 5,479 ± 2,098   | -1.40                                 | -1.40 | +2.10 | -1.90 |
|                                                      | B         | NP_776394        | 53.7/47.7                                               | 5.20/4.89                       | 1,249 ± 619          | 3,774 ± 1,918   | -3.00                                 | -2.10 | -2.15 | -1.10 |
|                                                      | B         | NP_776394        | 53.7/44.9                                               | 5.20/4.68                       | 1,371 ± 827          | 4,917 ± 1,818   | -3.60                                 | -2.25 | -1.55 | nd    |

nd = not detected in gel or no quantification possible.

\*C = *C. familiaris*; B = *B. taurus*; H = *H. sapiens*; M = *M. musculus*.

†SQ = mean spot quantity and standard deviation (technical replicates) of experiment 1; normalized by total quantity in valid spots. SQs of experiments 2 to 4 are not shown.

‡Fold change: (+) an increase in protein expression in  $VARas^{mut}$  cells; (-) a decrease in protein expression in  $VARas^{mut}$  cells.
